# Supplementary material
Source: ML conference proceedings conference paper supplement (https://openreview.net/forum?id=RBCxmxAgqo)
Supplement: supplementary_material [file attachment]

# Supplementary Materials: Reason-and-Execute Prompting: Enhancing MultiModal Large Language Models for Solving Geometry Questions

Anonymous Authors

## A PROMPTING TEMPLATE.

According to the requirements of different prompting methods, we have designed RaE prompting templates, CoT prompting templates, and PAL prompting templates for MM-LLMs to solve geometry questions, which are shown in Tables 1, 2, and 3, respectively.

Table 1: Two examples of RaE prompting template

| Let's use Python to solve geometry questions. Here are two examples of how to do it                                                                                                                                                                                                                                                                                                                                                                                                                                                                                                                                                                                                                                                                                                                                                                                                                                                                                                                                                                                             |  |
|---------------------------------------------------------------------------------------------------------------------------------------------------------------------------------------------------------------------------------------------------------------------------------------------------------------------------------------------------------------------------------------------------------------------------------------------------------------------------------------------------------------------------------------------------------------------------------------------------------------------------------------------------------------------------------------------------------------------------------------------------------------------------------------------------------------------------------------------------------------------------------------------------------------------------------------------------------------------------------------------------------------------------------------------------------------------------------|--|
| Q1: Given the images, in $\triangle ABC$ , it is known that $\angle A=80^\circ$ , $\angle B=60^\circ$ , $DE\parallel BC$ . Then, the measure of $\angle CED$ is ()                                                                                                                                                                                                                                                                                                                                                                                                                                                                                                                                                                                                                                                                                                                                                                                                                                                                                                              |  |
| <pre>#Reasoning: The question involves finding the degree measure of angle <math>\angle CED</math>. From the exercise text and the diagram, it can be inferred that solving this problem requires the use of the triangle angle sum theorem and corresponding angles postulate. Corresponding Angles Postulate: <math>\angle CED=180^\circ-\angle C</math> Triangle Angle Sum Theorem: <math>\angle C=180^\circ-\angle A-\angle B</math> Information to be obtained from question texts and images: <math>\angle A=80^\circ, \angle B=60^\circ</math> The solution that needs to be converted into Python code is: <math>\angle A=80, \angle B=60, \angle C=180-\angle A-\angle B, \angle CED=180-\angle C</math>  # Executing: def solution():     """The solution that needs to be converted into Python code is: <math>\angle A=80, \angle B=60, \angle C=180-\angle A-\angle B, \angle CED=180-\angle C</math>     """     angle_A = 80     angle_B = 60     angle_C = 180 - angle_A - angle_B     angle_CED = 180 - angle_C     result = angle_CED     return result</pre> |  |
| Q2: "Given the images, with circle O, chord AB = 18, M is the midpoint of AB, and OM = 12, then the radius of circle O is ()"                                                                                                                                                                                                                                                                                                                                                                                                                                                                                                                                                                                                                                                                                                                                                                                                                                                                                                                                                   |  |
| <pre>#reasoning: The question is to find the radius OB of the circle. It can be inferred from the exercise text and the image that solving this problem requires the Pythagorean theorem. Pythagorean theorem: <math>OB^2=OM^2+BM^2</math> M is the midpoint of AB: <math>BM=0.5*AB</math> Information to be obtained from question texts and images: <math>OM=12, AB=18</math> The solution that needs to be converted into Python code are: <math>OM=12, AB=18, BM=0.5*AB, OB^2=OM^2+BM^2</math>  #Executing: import math def solution():     """The operations that need to be converted into Python code are: <math>OM=12, AB=18, BM=0.5*AB, OB^2=OM^2+BM^2</math>"""     Line_AB = 18     Line_OM = 12     Line_BM = Line_AB / 2     Line_OB = math.sqrt(Line_OM * Line_OM + Line_BM * Line_BM)     result = Line_OB     return result</pre>                                                                                                                                                                                                                               |  |

Table 2: Two examples of CoT prompting template

| Step-by-step solving geometry questions. Here are two examples of how to do it                                                                                                                                                                                                                                                                                                                                                                                                                                                                                                                                                                                                                                                                                                                                                                                                                                                                                                                                                                                                                                                                                                                                                                                                                                                                                                                                                                                                                                                                                                                                                                                                                                                                                                                                                                                                                                                                                                                                                                                                                                                                                                                                                                                                                                                                                                                                                                                           |  |
|--------------------------------------------------------------------------------------------------------------------------------------------------------------------------------------------------------------------------------------------------------------------------------------------------------------------------------------------------------------------------------------------------------------------------------------------------------------------------------------------------------------------------------------------------------------------------------------------------------------------------------------------------------------------------------------------------------------------------------------------------------------------------------------------------------------------------------------------------------------------------------------------------------------------------------------------------------------------------------------------------------------------------------------------------------------------------------------------------------------------------------------------------------------------------------------------------------------------------------------------------------------------------------------------------------------------------------------------------------------------------------------------------------------------------------------------------------------------------------------------------------------------------------------------------------------------------------------------------------------------------------------------------------------------------------------------------------------------------------------------------------------------------------------------------------------------------------------------------------------------------------------------------------------------------------------------------------------------------------------------------------------------------------------------------------------------------------------------------------------------------------------------------------------------------------------------------------------------------------------------------------------------------------------------------------------------------------------------------------------------------------------------------------------------------------------------------------------------------|--|
| Q1: As shown in the figure, the line EF intersects AB at point E, intersects CD at point F, EG bisects $\angle BEF$ , intersects CD at point G, $\angle 1=50^\circ$ , then $\angle 2$ is equal to ()                                                                                                                                                                                                                                                                                                                                                                                                                                                                                                                                                                                                                                                                                                                                                                                                                                                                                                                                                                                                                                                                                                                                                                                                                                                                                                                                                                                                                                                                                                                                                                                                                                                                                                                                                                                                                                                                                                                                                                                                                                                                                                                                                                                                                                                                     |  |
| <pre># Step-by-step solving geometry question: In this geometry problem, we have two parallel lines AB and CD, with a transversal EF intersecting AB at E and CD at F. A line segment EG bisects angle BEF and intersects CD at G. We are given that angle 1 (<math>\angle 1</math>) is <math>50^\circ</math>, and we need to find the measure of angle 2 (<math>\angle 2</math>). The known variables are that AB is parallel to CD, <math>\angle 1</math> is <math>50^\circ</math>, and EG bisects <math>\angle BEF</math>. The unknown variable is the measure of <math>\angle 2</math>. Since AB//CD and EF is a transversal, we can use properties of alternate interior angles, corresponding angles, and the angle bisector principle to find the unknown angle. First, we need to establish the relationship between the given angles and <math>\angle 2</math>. Then, by understanding that EG bisects <math>\angle BEF</math>, we can infer relationships between the angles formed. Performing Calculations: 1. Since AB//CD and EF is a transversal, <math>\angle BEF</math> and the angle formed by EF and CD (let's call it <math>\angle EFD</math> for clarification) are supplementary because they form a linear pair. Knowing <math>\angle 1</math> is <math>50^\circ</math> and it's given as an alternate interior angle to <math>\angle EFD</math> (since AB//CD and EF is a transversal), we can establish that <math>\angle EFD</math> also equals <math>50^\circ</math>. 2. Since EG bisects <math>\angle BEF</math>, it divides it into two equal parts. Let's denote the measure of each part as x. Therefore, <math>\angle BEG = x</math> and <math>\angle GEF = x</math>. 3. We can find x by understanding that <math>\angle BEF + \angle EFD = 180^\circ</math> (linear pair). However, since <math>\angle 1 = 50^\circ</math> and it corresponds to <math>\angle EFD</math>, we know <math>\angle EFD</math> is also <math>50^\circ</math>. This helps in establishing the entire angle <math>\angle BEF = 180^\circ - 50^\circ = 130^\circ</math>. Since EG bisects <math>\angle BEF</math>, <math>x = 130^\circ / 2 = 65^\circ</math>. 4. Therefore, <math>\angle BEG = x = 65^\circ</math>. Since <math>\angle 2</math> is an alternate interior angle to <math>\angle BEG</math> (with AB//CD and EG as the transversal), <math>\angle 2</math> also equals <math>65^\circ</math> by the property of alternate interior angles.</pre> |  |
| This is our answer:65                                                                                                                                                                                                                                                                                                                                                                                                                                                                                                                                                                                                                                                                                                                                                                                                                                                                                                                                                                                                                                                                                                                                                                                                                                                                                                                                                                                                                                                                                                                                                                                                                                                                                                                                                                                                                                                                                                                                                                                                                                                                                                                                                                                                                                                                                                                                                                                                                                                    |  |
| Q2: As shown in the figure, the radii of two concentric circles are 4cm and 5cm respectively. If one chord AB of the larger circle is tangent to the smaller circle, then the length of chord AB is ()                                                                                                                                                                                                                                                                                                                                                                                                                                                                                                                                                                                                                                                                                                                                                                                                                                                                                                                                                                                                                                                                                                                                                                                                                                                                                                                                                                                                                                                                                                                                                                                                                                                                                                                                                                                                                                                                                                                                                                                                                                                                                                                                                                                                                                                                   |  |
| <pre># Step-by-step solving geometry question: In this problem, we need to determine the length of a chord that is tangent to two intersecting circles, one larger and one smaller. We are dealing with a geometric problem involving the Pythagorean theorem and properties of triangles. We know the diameter OC of the larger circle is 4 centimeters, and the radius OA of the smaller circle is 5 centimeters. Given that OC⊥AB and AC=BC=1/2AB, we need to find the length of the chord AB. We will use the Pythagorean theorem to solve this problem. By constructing a right triangle and utilizing the Pythagorean theorem, we can find the length of the chord AB. Connect OC and AO. Chord AB of the larger circle is tangent to the smaller circle. Since OC⊥AB, AC=BC=AB/2. Let's calculate the length of AB. Since OA=5cm and OC=4cm, in the right triangle AOC, <math>AC=\sqrt{(OA^2-OC^2)}=3\text{cm}</math>. <math>AB=2*AC=6\text{cm}</math></pre>                                                                                                                                                                                                                                                                                                                                                                                                                                                                                                                                                                                                                                                                                                                                                                                                                                                                                                                                                                                                                                                                                                                                                                                                                                                                                                                                                                                                                                                                                                      |  |
| This is our answer: 6                                                                                                                                                                                                                                                                                                                                                                                                                                                                                                                                                                                                                                                                                                                                                                                                                                                                                                                                                                                                                                                                                                                                                                                                                                                                                                                                                                                                                                                                                                                                                                                                                                                                                                                                                                                                                                                                                                                                                                                                                                                                                                                                                                                                                                                                                                                                                                                                                                                    |  |

Table 3: Two examples of PAL prompting template

| Step-by-step solving geometry questions. Here are two examples of how to do it                                                                                                                                                                                                                                                                                                                                                                            |  |
|-----------------------------------------------------------------------------------------------------------------------------------------------------------------------------------------------------------------------------------------------------------------------------------------------------------------------------------------------------------------------------------------------------------------------------------------------------------|--|
| Q1: Given the images, in $\triangle ABC$ , it is known that $\angle A=80^\circ$ , $\angle B=60^\circ$ , $DE\parallel BC$ . Then, the measure of $\angle CED$ is ()                                                                                                                                                                                                                                                                                        |  |
| <pre># solution in Python: def solution():     """Given the images, in <math>\triangle ABC</math>, it is known that <math>\angle A=80^\circ</math>, <math>\angle B=60^\circ</math>, <math>DE\parallel BC</math>. Then, the measure of <math>\angle CED</math> is ()"""     angle_A = 80     angle_B = 60     angle_C = 180 - angle_A - angle_B     angle_CED = 180 - angle_C     result = angle_CED     return result</pre>                               |  |
| Q2: In the images, where AB is parallel to CD, the line EF intersects AB at point E and intersects CD at point F. Line EG bisects angle BEF, intersecting CD at point G. Given that angle 1 is $50^\circ$ , the measure of angle 2 is ()                                                                                                                                                                                                                  |  |
| <pre># solution in Python: def solution():     """In the images, where AB is parallel to CD, the line EF intersects AB at point E and intersects CD at point F. Line EG bisects angle BEF,     intersecting CD at point G. Given that angle 1 is <math>50^\circ</math>, the measure of angle 2 is ()"""     angle_1 = 50     angle_BEf = 180 - angle_1     angle_BEg = angle_BEf / 2     angle_2 = angle_BEg     result = angle_2     return result</pre> |  |

**Table 4: Domain knowledge statistics for GeoQA+ dataset (Partial)**

| Domain Knowledge                                      | Quantity    |
|-------------------------------------------------------|-------------|
| Properties of isosceles triangles                     | 37          |
| Properties of the vertical bisector of a line segment | 48          |
| Properties of a right triangle                        | 4           |
| Properties of equilateral triangles                   | 8           |
| Polygon inner and outer angles                        | 17          |
| Triangle median line theorem                          | 110         |
| Properties of parallelograms                          | 179         |
| External angle properties of triangles                | 29          |
| Triangle inner angles and theorem                     | 57          |
| Circular angle theorem                                | 79          |
| Outer circle and center of a triangle                 | 9           |
| Properties of inscribed quadrilaterals in circles     | 4           |
| Properties of tangents                                | 40          |
| Calculation of Cones                                  | 19          |
| Relationship between center angle, arc, and chord     | 2           |
| Inscribed circle and inner circle of a triangle       | 2           |
| Properties of parallel lines                          | 315         |
| Right-angled triangle with a 30-degree angle          | 8           |
| Determination and properties of parallel lines        | 13          |
| Determination of parallel lines                       | 3           |
| Properties of congruent triangles                     | 38          |
| Determination and properties of congruent triangles   | 18          |
| Properties of the angular bisector                    | 39          |
| Definition of acute trigonometric function            | 4           |
| Solving right-angled triangles                        | 12          |
| Trigonometric function value for special angles       | 1           |
| Regular polygons and circles                          | 3           |
| Median line on the hypotenuse of a right triangle     | 19          |
| Property of diamond                                   | 79          |
| Properties of rectangles                              | 66          |
| Properties of a square                                | 6           |
| Definition of angular bisector                        | 2           |
| Direction angle                                       | 6           |
| Drawing - Basic Drawing                               | 2           |
| Nature of translation                                 | 4           |
| Vertical line                                         | 12          |
| To vertex angle and adjacent complementary angle      | 14          |
| Shortest vertical line segment                        | 1           |
| Congruent graphics                                    | 2           |
| Calculation of angles                                 | 6           |
| Application of Pythagorean theorem                    | 14          |
| Area of triangle                                      | 275         |
| Trapezoid                                             | 4           |
| <b>Mixup</b>                                          | <b>1273</b> |

**Table 5: Domain knowledge statistics for GeoQA dataset (Partial)**

| Domain Knowledge               | Quantity    |
|--------------------------------|-------------|
| Parallel lines                 | 104         |
| Isosceles triangle             | 23          |
| Adjacent complementary angles  | 10          |
| Polygon                        | 16          |
| Right triangle                 | 30          |
| Cone calculations              | 48          |
| Rotation                       | 21          |
| Similar triangles              | 287         |
| Median in a triangle           | 22          |
| Tangent                        | 108         |
| Sum of angles in a triangle    | 24          |
| Perpendicular bisector         | 8           |
| Central angle                  | 245         |
| Translation                    | 10          |
| Rectangle                      | 8           |
| Pythagorean theorem            | 14          |
| Symmetry                       | 17          |
| Interior alternate angles      | 8           |
| Angle bisector                 | 31          |
| Parallelogram                  | 109         |
| Corresponding angles           | 3           |
| Equilateral triangle           | 6           |
| Exterior angles of a triangle  | 28          |
| Direction angle                | 9           |
| Perpendicular                  | 4           |
| Perpendicular bisector theorem | 8           |
| Rhombus                        | 15          |
| Distance                       | 55          |
| Similarity                     | 10          |
| Square                         | 6           |
| Central angle of a circle      | 15          |
| Sector area                    | 9           |
| Cylinder calculations          | 1           |
| Trigonometric functions        | 46          |
| Solid figures                  | 4           |
| Circumscribed quadrilateral    | 40          |
| Corresponding angles           | 7           |
| Dial angle                     | 1           |
| Three views                    | 5           |
| <b>Mixup</b>                   | <b>3595</b> |

## B DOMAIN KNOWLEDGE STATISTICS

To analyze the impact of different amounts of domain knowledge on MM-LLMs solving geometry questions, we counted the number of questions involved in different domain knowledge in the GeoQA+ and GeoQA datasets, as shown in Tables 4 and 5, respectively.
